# Supplementary material for: Emodin Alleviates Intestinal Barrier Dysfunction by Inhibiting Apoptosis and Regulating the Immune Response in Severe Acute Pancreatitis
Source: PubMed Central journal article supplement — Pancreas. 2021 Oct 19;50(8):1202–11. doi: 10.1097/MPA.0000000000001894 (PMC8565508; doi:10.1097/mpa.0000000000001894), 2021-10-19
Supplement: pancreas-50-1202-s001.pdf [file pancreas-50-1202-s001.pdf]

# Emodin Alleviates Intestinal Barrier Dysfunction by Inhibiting Apoptosis and Regulating the Immune Response in Severe Acute Pancreatitis

## SUPPLEMENTAL DIGITAL CONTENT

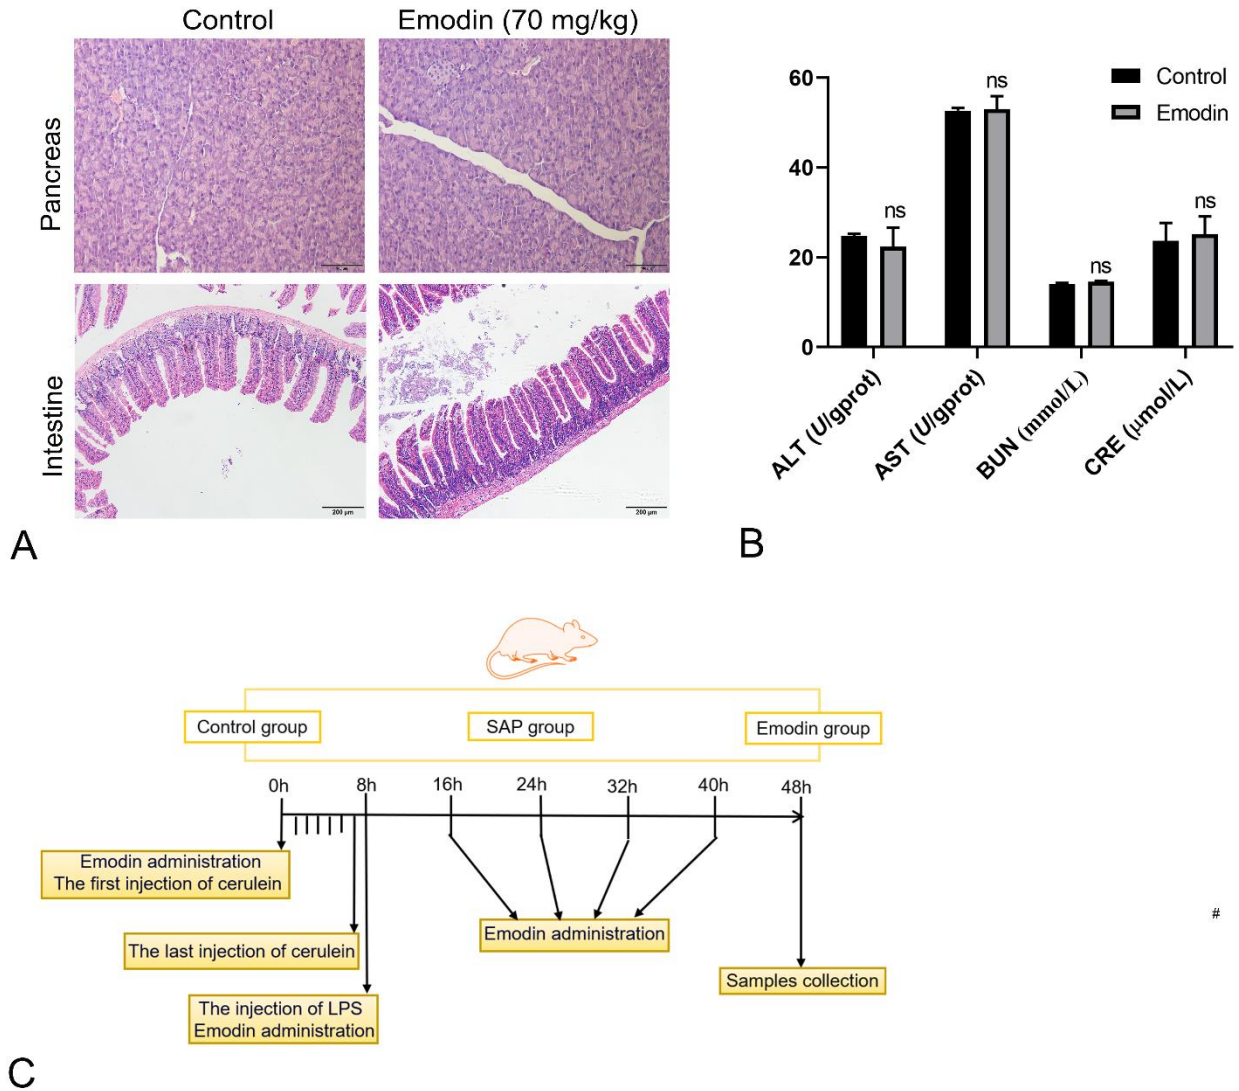

**SUPPLEMENTAL FIGURE 1.** Toxicology evaluation of emodin. A, HE staining for intestine and pancreas. B, Evaluation of the hepatotoxicity and nephrotoxicity of each treatment by measuring the serum levels of amylase and creatinine, aspartate aminotransferase, alanine aminotransferase, and urea nitrogen. C, Schematic diagram of experimental design.
